# Supplementary material for: Theoretical insights into the central “acceptor” bridge function on the whole visible light and near-infrared emission in tetraphenylpyrazine-based luminogens
Source: Royal Society of Chemistry journal article supplement (doi:10.1039/d2nj03596k), 2022-01-01
Supplement: d2nj03596k1.pdf [file d2nj03596k1.pdf]

## Supplementary Information for

### Theoretical insights into the central “acceptor” bridge function on whole visible light and near-infrared emission in tetraphenylpyrazine-based luminogens

Guangshuai Gong,<sup>‡<sup>a</sup></sup> Xiaoxu Dong,<sup>‡<sup>a</sup></sup> Xin Ran,<sup>a</sup> Jinglin Mu,<sup>a</sup> Tian Zhang<sup>\*<sup>a</sup></sup> and Zhiming Wang<sup>\*<sup>b</sup></sup>

<sup>a</sup>School of Chemistry and Chemical Engineering, Shandong University of Technology, Zibo 255049, China. E-mail: [tzhang@sdut.edu.cn](mailto:tzhang@sdut.edu.cn)

<sup>b</sup>AIE institute, State Key Laboratory of Luminescent Materials and Devices, Center for Aggregation-Induced Emission, Guangdong Provincial Key Laboratory of Luminescence from Molecular Aggregates, South China University of Technology, Guangzhou 510640, China. E-mail: [wangzhiming@scut.edu.cn](mailto:wangzhiming@scut.edu.cn)

<sup>‡</sup> These authors contributed equally.

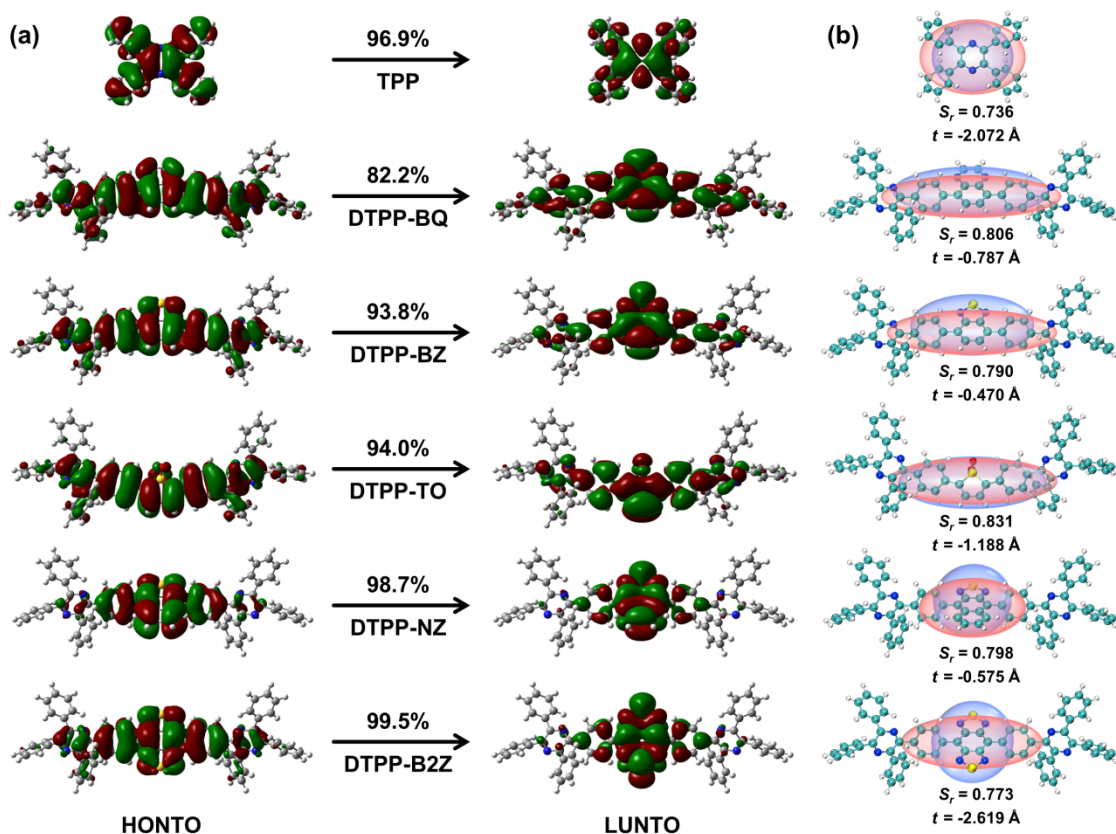

**Fig. S1** NTO characters and transition proportions for TPP and its derivatives at the  $S_0$ -optimized geometries in solution (a). Centroids of holes (red region) and electrons (blue region) for the corresponding transition (b).

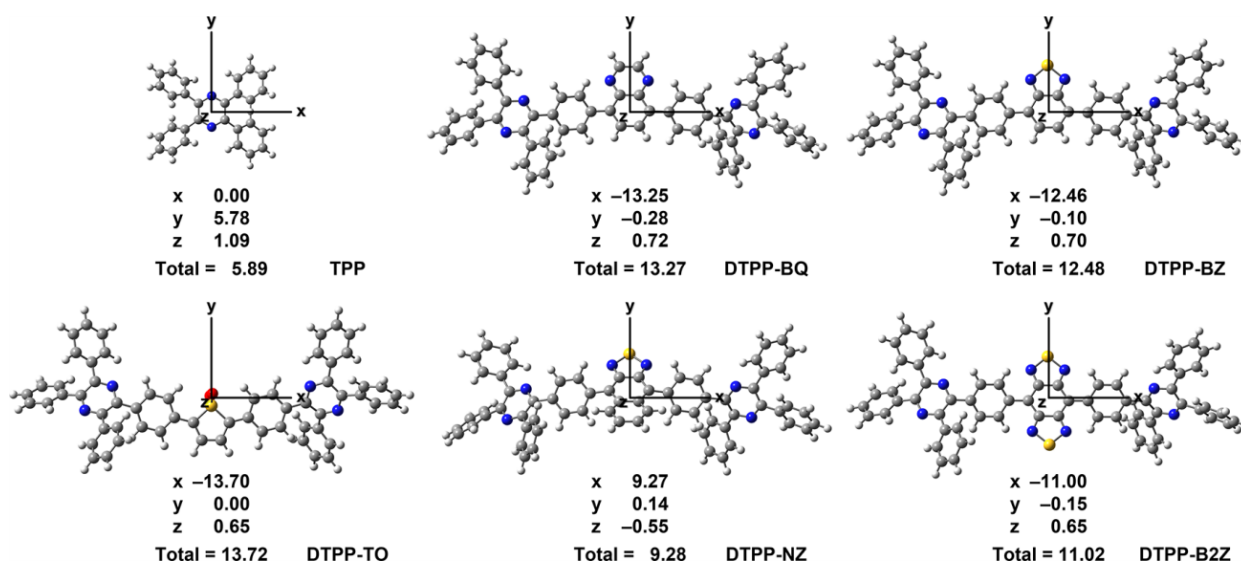

**Fig. S2** Electric transition dipole moment values (in Debye) for TPP and its derivatives at their  $S_1$ -optimized geometries in solution.

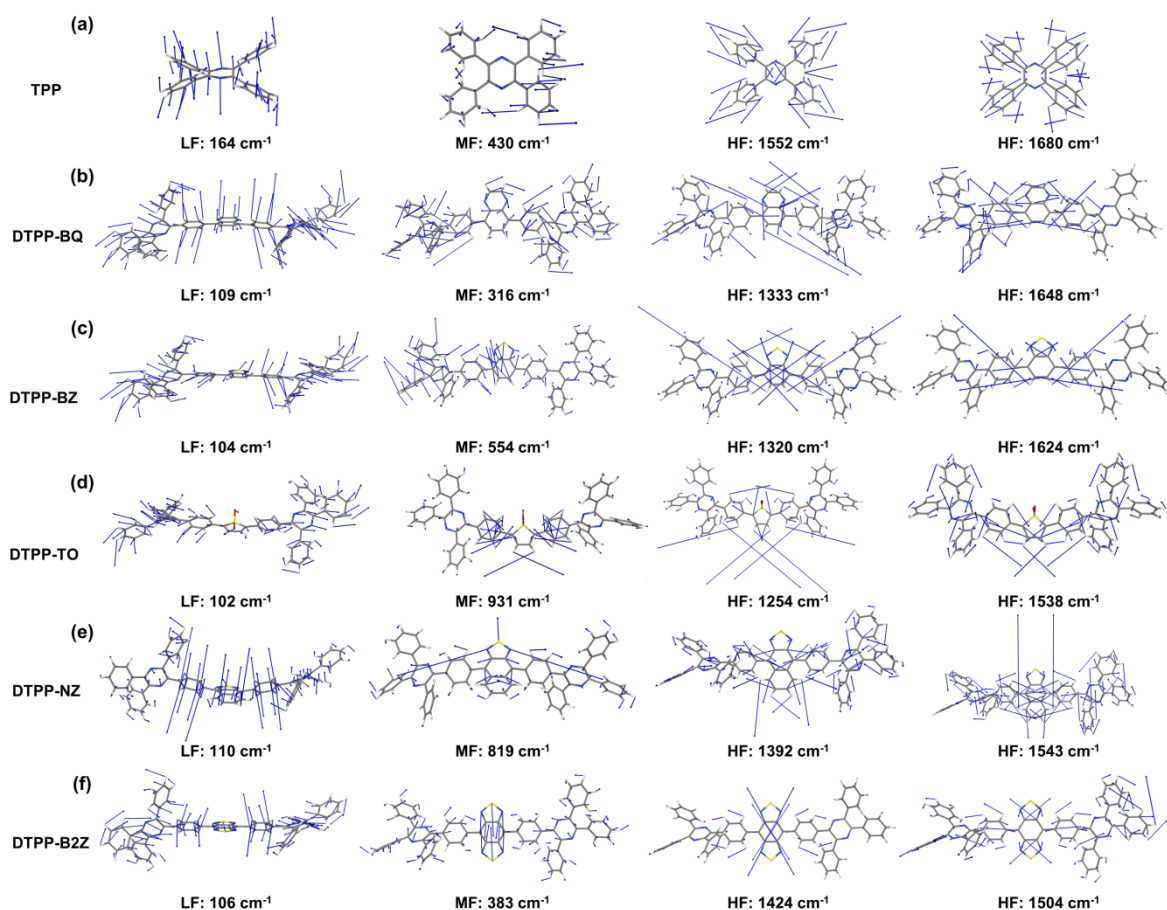

**Fig. S3** Diagrammatic illustration of selected normal modes with major  $\lambda_j$  in LF, MF and HF regions for TPP and its derivatives in solution.

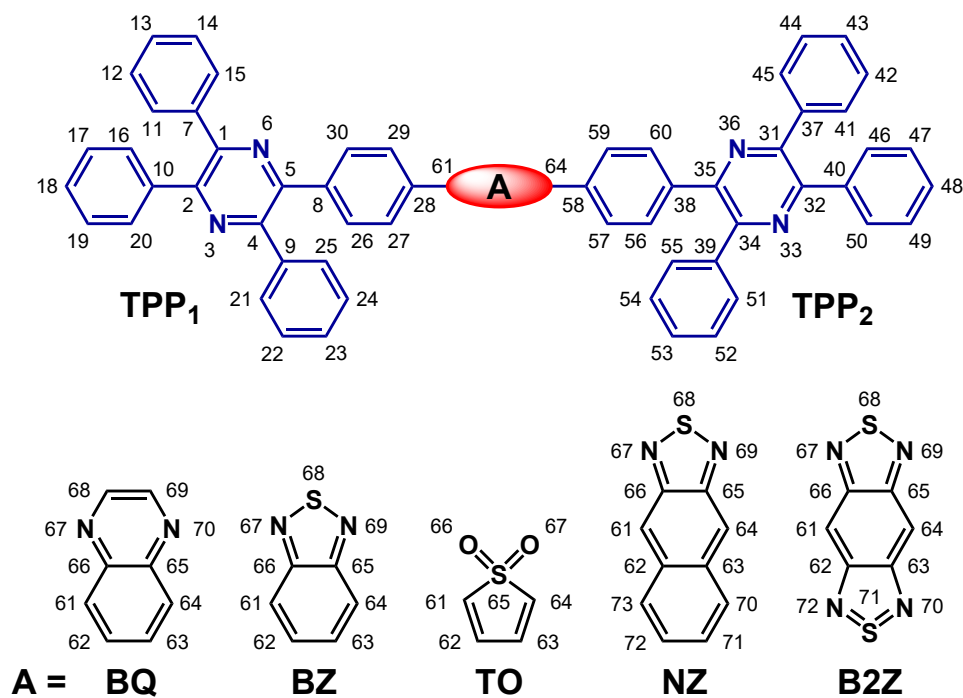

**Fig. S4** Molecular structures of TPP derivatives with the labeled atom index.

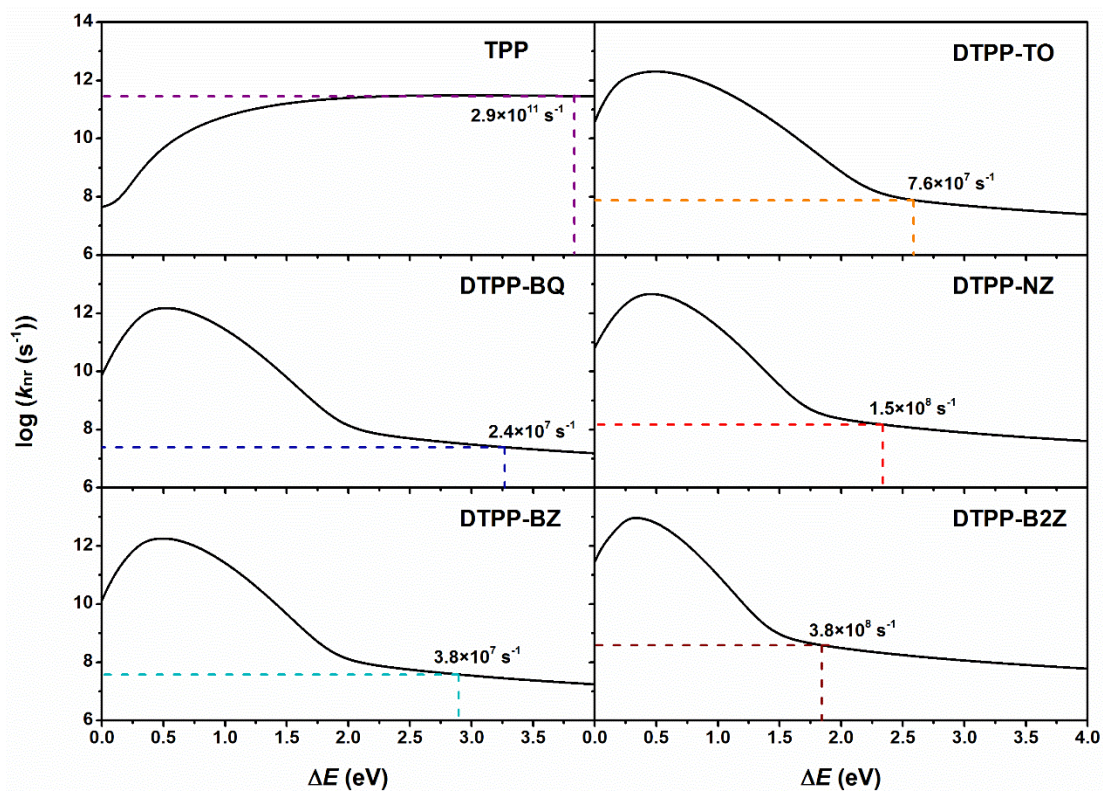

**Fig. S5** Calculated logarithm of the non-radiative decay rate  $\log(k_{nr})$  versus the energy gap  $\Delta E$  for TPP and its derivatives in solution. The vertical dash line indicates the position of the adiabatic energy gap  $\Delta E_{ad}$ .

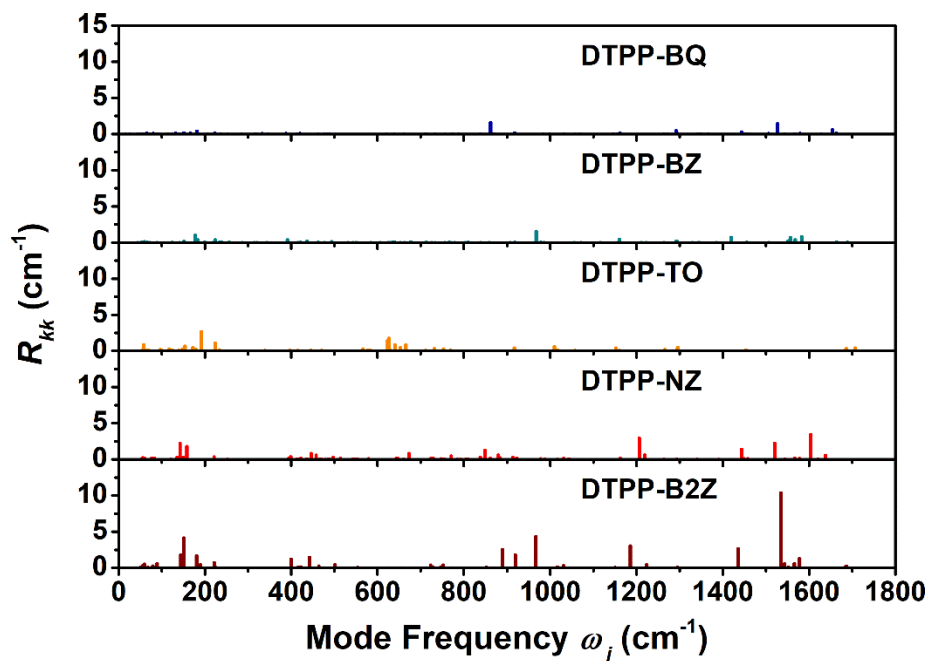

**Fig. S6** Diagonal elements  $R_{kk}$  of the electronic coupling matrix  $R_{kl}$  versus mode frequency  $\omega_j$  for TPP derivatives in solution.

**Table S1** Calculated SOC constants between  $S_1$  and low triplet excited states ( $T_1$ ,  $T_2$ ,  $T_3$ ) for TPP derivatives (all at  $S_1$ -optimized geometries) at the CAM-B3LYP/6-31G(d) level.

| $\langle S_1$ | $ \hat{H}_{\text{soc}} $ | $T_1$ | $T_2$ | $T_3$ |
|---------------|--------------------------|-------|-------|-------|
| $T_n\rangle$  |                          |       |       |       |
| DTPP-BQ       |                          | 0.04  | 0.13  | 0.16  |
| DTPP-BZ       |                          | 0.07  | 0.12  | 0.09  |
| DTPP-TO       |                          | 0.00  | 0.06  | 0.07  |
| DTPP-NZ       |                          | 0.00  | 0.07  | 0.19  |
| DTPP-B2Z      |                          | 0.00  | 0.16  | 0.15  |

**Table S2** Selected dihedral angles (in deg.) for TPP and its derivatives in solution.  $S_0/S_1$  and  $\Delta$  represent the geometric parameters extracted from the optimized  $S_0/S_1$  states and the modifications between the two states, respectively.

|     | $S_0$   | $S_1$  | $\Delta$ | $S_0$   | $S_1$  | $\Delta$ | $S_0$    | $S_1$  | $\Delta$ |
|-----|---------|--------|----------|---------|--------|----------|----------|--------|----------|
|     | TPP     |        |          | DTPP-BQ |        |          | DTPP-BZ  |        |          |
| 1 - | 44.05   | 36.26  | 7.79     | 37.42   | 36.02  | 1.40     | 37.18    | 35.98  | 1.20     |
| 2 - | 44.06   | 36.26  | 7.80     | 37.25   | 32.85  | 4.40     | 36.80    | 34.01  | 2.79     |
| 3 - | -44.04  | -15.29 | 28.75    | 37.95   | 34.46  | 3.49     | 37.59    | 35.15  | 2.43     |
| 4 - | -44.06  | -15.29 | 28.77    | 36.03   | 25.51  | 10.52    | 35.73    | 27.36  | 8.37     |
| 1'  | —       | —      | —        | 37.01   | 36.49  | 0.52     | 37.12    | 36.44  | 0.69     |
| 2'  | —       | —      | —        | 37.28   | 33.55  | 3.73     | 37.15    | 33.83  | 3.32     |
| 3'  | —       | —      | —        | 36.91   | 34.52  | 2.38     | 37.41    | 34.97  | 2.44     |
| 4'  | —       | —      | —        | 36.53   | 27.56  | 8.97     | 36.44    | 28.00  | 8.43     |
| 5 - | —       | —      | —        | -42.56  | -24.78 | 17.78    | -35.34   | -17.47 | 17.87    |
| 5'  | —       | —      | —        | 42.95   | 25.79  | 17.16    | 36.07    | 17.12  | 18.95    |
|     | DTPP-TO |        |          | DTPP-NZ |        |          | DTPP-B2Z |        |          |
| 1 - | 37.15   | 35.97  | 1.18     | 37.54   | 36.74  | 0.80     | 37.02    | 36.21  | 0.81     |
| 2 - | 36.88   | 32.98  | 3.90     | 37.03   | 35.50  | 1.53     | 36.71    | 34.20  | 2.51     |
| 3 - | 37.64   | 34.91  | 2.73     | 37.78   | 36.97  | 0.81     | 37.16    | 35.47  | 1.69     |
| 4 - | 35.02   | 26.35  | 8.67     | 36.59   | 31.32  | 5.27     | 34.97    | 29.12  | 5.85     |
| 1'  | 37.18   | 35.92  | 1.26     | 37.25   | 36.83  | 0.42     | 37.33    | 36.55  | 0.78     |
| 2'  | 36.79   | 33.01  | 3.78     | 37.03   | 35.84  | 1.19     | 36.94    | 34.90  | 2.04     |
| 3'  | 37.39   | 34.86  | 2.53     | 36.99   | 36.53  | 0.46     | 37.12    | 35.70  | 1.42     |
| 4'  | 35.13   | 26.52  | 8.61     | 36.90   | 32.22  | 4.68     | 36.19    | 30.81  | 5.38     |
| 5 - | -20.26  | -2.60  | 17.66    | -56.64  | -38.99 | 17.65    | -39.16   | -28.68 | 10.48    |
| 5'  | 18.65   | 2.02   | 16.63    | 57.48   | 39.93  | 17.55    | 39.39    | 28.95  | 10.44    |

**Table S3** Calculated vertical transition energies  $\Delta E_{\text{vert}}$  related to absorption (Abs.) and emission (Emi.) peaks as well as available experimental (Exp.) values (in eV and nm), oscillator strengths  $f$  and HONTO→LUNTO (H→L) components for TPP and its derivatives in solution.

|          |      | $\Delta E_{\text{vert}}$ | Exp.       | $f$  | H→L   |
|----------|------|--------------------------|------------|------|-------|
| TPP      | Abs. | 4.22 (294)               | 3.67 (338) | 0.62 | 96.9% |
|          | Emi. | 3.17 (391)               | 3.18 (390) | 0.42 | 97.8% |
| DTPP-BQ  | Abs. | 3.61 (343)               | N. A.      | 1.80 | 82.2% |
|          | Emi. | 2.79 (444)               | N. A.      | 1.87 | 92.4% |
| DTPP-BZ  | Abs. | 3.22 (385)               | 3.08 (403) | 1.31 | 93.8% |
|          | Emi. | 2.45 (506)               | 2.44 (509) | 1.45 | 96.3% |
| DTPP-TO  | Abs. | 2.94 (422)               | 2.91 (426) | 1.56 | 94.0% |
|          | Emi. | 2.08 (596)               | 2.34 (529) | 1.49 | 97.0% |
| DTPP-NZ  | Abs. | 2.61 (475)               | N. A.      | 0.53 | 98.7% |
|          | Emi. | 1.91 (649)               | N. A.      | 0.62 | 99.5% |
| DTPP-B2Z | Abs. | 2.04 (608)               | N. A.      | 0.68 | 99.5% |
|          | Emi. | 1.56 (795)               | N. A.      | 0.72 | 99.9% |

**Table S4** Bond lengths with large relaxation energies (>1 meV) for TPP and its derivatives in solution.

| TPP             | meV   | DTPP-BQ         | meV   | DTPP-BZ         | meV   |
|-----------------|-------|-----------------|-------|-----------------|-------|
| <b>PRZ</b>      |       | <b>BQ</b>       |       | <b>BZ</b>       |       |
| C4-C5           | 46.21 | C61-C62         | 23.13 | C62-C63         | 35.43 |
| C1-C2           | 44.64 | C63-C64         | 22.82 | C63-C64         | 30.68 |
| C2-N3           | 1.11  | C62-C63         | 22.07 | C61-C62         | 30.42 |
| C1-N6           | 1.10  | N67-C68         | 12.83 | N67-S68         | 12.30 |
| <b>Junction</b> |       | C68-C69         | 12.65 | S68-N69         | 12.06 |
| C4-C9           | 30.59 | C69-N70         | 12.38 | <b>Junction</b> |       |
| C5-C8           | 30.53 | C61-C66         | 1.64  | C28-C61         | 16.40 |
| C1-C7           | 7.40  | C64-C65         | 1.56  | C58-C64         | 15.52 |
| C2-C10          | 7.38  | <b>Junction</b> |       | <b>TPP</b>      |       |
| <b>Phenyl</b>   |       | C28-C61         | 19.92 | C28-C29         | 4.49  |
| C9-C25          | 8.99  | C58-C64         | 16.96 | C5-C8           | 4.42  |
| C8-C26          | 8.97  | <b>TPP</b>      |       | C27-C28         | 4.19  |
| C9-C21          | 5.97  | C5-C8           | 7.21  | C58-C59         | 4.04  |
| C8-C30          | 5.97  | C28-C29         | 5.42  | C57-C58         | 4.02  |
| C28-C29         | 3.98  | C35-C38         | 5.11  | C35-C38         | 3.88  |
| C22-C23         | 3.98  | C27-C28         | 4.79  | C8-C26          | 2.24  |
| C29-C30         | 2.44  | C58-C59         | 4.54  | C38-C56         | 2.06  |
| C21-C22         | 2.44  | C57-C58         | 3.89  | C26-C27         | 2.06  |
| C7-C11          | 2.14  | C8-C26          | 3.42  | C56-C57         | 1.89  |
| C10-C16         | 2.13  | C26-C27         | 2.65  | C8-C30          | 1.78  |
| C7-C15          | 1.69  | C38-C56         | 2.59  | C29-C30         | 1.76  |
| C10-C20         | 1.68  | C8-C30          | 2.51  | C38-C60         | 1.57  |
|                 |       | C29-C30         | 2.36  | C59-C60         | 1.57  |
|                 |       | C56-C57         | 2.08  | C1-C2           | 1.04  |
|                 |       | C38-C60         | 1.93  |                 |       |
|                 |       | C59-C60         | 1.75  |                 |       |
|                 |       | C1-C2           | 1.61  |                 |       |
|                 |       | C4-C5           | 1.23  |                 |       |
|                 |       | C31-C32         | 1.22  |                 |       |
| DTPP-TO         |       | DTPP-NZ         |       | DTPP-B2Z        |       |
| <b>TO</b>       |       | <b>NZ</b>       |       | <b>B2Z</b>      |       |
| C62-C63         | 73.42 | N67-S68         | 18.89 | N67-S68         | 11.50 |
| C61-C62         | 53.77 | S68-N69         | 18.63 | S71-N72         | 11.47 |
| C63-C64         | 53.43 | C71-C72         | 16.92 | S68-N69         | 11.33 |
| C64-S65         | 4.10  | C61-C62         | 13.31 | N70-S71         | 11.32 |
| C61-S65         | 3.96  | C63-C64         | 13.09 | C64-C65         | 4.58  |
| S65-O66         | 1.51  | C72-C73         | 12.08 | C61-C62         | 4.53  |
| S65-O67         | 1.24  | C70-C71         | 11.94 | C63-C64         | 4.50  |
| <b>Junction</b> |       | C62-C73         | 6.28  | C61-C66         | 4.39  |

|            |       |                 |      |                 |      |
|------------|-------|-----------------|------|-----------------|------|
| C58-C64    | 19.07 | C63-C70         | 6.18 | C62-N72         | 3.30 |
| C28-C61    | 19.01 | C62-C63         | 5.45 | C66-N67         | 3.28 |
| <b>TPP</b> |       | C61-C66         | 1.91 | C63-N70         | 3.28 |
| C5-C8      | 5.76  | C64-C65         | 1.74 | C65-N69         | 3.26 |
| C35-C38    | 5.64  | <b>Junction</b> |      | <b>Junction</b> |      |
| C28-C29    | 5.14  | C28-C61         | 8.84 | C28-C61         | 7.95 |
| C58-C59    | 5.03  | C58-C64         | 8.21 | C58-C64         | 7.45 |
| C27-C28    | 4.71  | <b>TPP</b>      |      | <b>TPP</b>      |      |
| C57-C58    | 4.56  | C27-C28         | 1.32 | C28-C29         | 1.97 |
| C38-C60    | 2.98  | C28-C29         | 1.26 | C58-C59         | 1.83 |
| C8-C30     | 2.93  | C57-C58         | 1.08 | C27-C28         | 1.77 |
| C29-C30    | 2.49  | C58-C59         | 1.06 | C5-C8           | 1.70 |
| C59-C60    | 2.48  |                 |      | C57-C58         | 1.63 |
| C8-C26     | 1.74  |                 |      | C35-C38         | 1.36 |
| C38-C56    | 1.71  |                 |      |                 |      |
| C26-C27    | 1.52  |                 |      |                 |      |
| C56-C57    | 1.46  |                 |      |                 |      |
| C34-C35    | 1.14  |                 |      |                 |      |
| C4-C5      | 1.11  |                 |      |                 |      |
| C1-C2      | 1.10  |                 |      |                 |      |
| C31-C32    | 1.07  |                 |      |                 |      |

---



**Table S5** Bond angles with large relaxation energies (>1 meV) for TPP and its derivatives in solution.

| TPP             | meV  | DTPP-BQ         | meV   | DTPP-BZ         | meV   |
|-----------------|------|-----------------|-------|-----------------|-------|
| <b>Junction</b> |      | <b>Junction</b> |       | <b>BZ</b>       |       |
| N3-C4-C9        | 2.46 | C58-C64-C63     | 1.01  | N67-S68-N69     | 4.85  |
| N6-C5-C8        | 2.46 |                 |       | <b>Junction</b> |       |
| C4-C5-C8        | 1.26 |                 |       | C28-C61-C62     | 2.17  |
| C5-C4-C9        | 1.26 |                 |       | C58-C64-C63     | 2.09  |
| C4-C9-C21       | 1.19 |                 |       |                 |       |
| C5-C8-C30       | 1.19 |                 |       |                 |       |
| <b>Phenyl</b>   |      |                 |       |                 |       |
| C21-C9-C25      | 1.07 |                 |       |                 |       |
| C26-C8-C30      | 1.07 |                 |       |                 |       |
| DTPP-TO         |      | DTPP-NZ         |       | DTPP-B2Z        |       |
| <b>TO</b>       |      | <b>NZ</b>       |       | <b>B2Z</b>      |       |
| O66-S65-O67     | 5.35 | N67-S68-N69     | 11.60 | N67-S68-N69     | 12.93 |
| C61-S65-O66     | 1.05 | C66-C65-N69     | 1.99  | N70-S71-N72     | 12.88 |
| C64-S65-O67     | 1.02 | C65-C66-N67     | 1.95  | C62-C61-C66     | 2.57  |
| C63-C64-S65     | 1.00 | C71-C72-C73     | 1.16  | C63-C64-C65     | 2.50  |
| <b>Junction</b> |      | C70-C71-C72     | 1.15  | C65-C66-N67     | 1.32  |
| C58-C64-C63     | 1.57 |                 |       | C63-C62-N72     | 1.30  |
| C28-C61-C62     | 1.45 |                 |       | C62-C63-N70     | 1.27  |
| <b>TPP</b>      |      |                 |       | C66-C65-N69     | 1.26  |
| C27-C28-C29     | 1.01 |                 |       |                 |       |

**Table S6** Dihedral angles with large relaxation energies (>1 meV) for TPP and its derivatives in solution.

| TPP             | meV   | DTPP-BQ         | meV   | DTPP-BZ         | meV   |
|-----------------|-------|-----------------|-------|-----------------|-------|
| <b>PRZ</b>      |       | <b>Junction</b> |       | <b>Junction</b> |       |
| N3-C4-C5-N6     | 3.67  | C57-C58-C64-C63 | 19.06 | C27-C28-C61-C66 | 14.40 |
| C4-N3-C2-C10    | 2.04  | C29-C28-C61-C62 | 18.99 | C29-C28-C61-C66 | 14.05 |
| C5-N6-C1-C7     | 2.04  | C27-C28-C61-C62 | 18.85 | C27-C28-C61-C62 | 13.81 |
| N3-C2-C1-N6     | 1.37  | C59-C58-C64-C63 | 18.66 | C29-C28-C61-C62 | 13.52 |
| <b>Phenyl</b>   |       | C29-C28-C61-C66 | 17.98 | C57-C58-C64-C65 | 12.29 |
| C4-C5-C8-C26    | 54.14 | C27-C28-C61-C66 | 17.91 | C59-C58-C64-C65 | 11.98 |
| C5-C4-C9-C25    | 54.11 | C57-C58-C64-C65 | 17.70 | C57-C58-C64-C63 | 11.63 |
| C6-C5-C8-C26    | 50.99 | C59-C58-C64-C65 | 17.26 | C59-C58-C64-C63 | 11.33 |
| C3-C4-C9-C25    | 50.96 | <b>TPP</b>      |       | <b>TPP</b>      |       |
| C4-C5-C8-C30    | 38.65 | C6-C5-C8-C26    | 6.78  | C6-C5-C8-C26    | 3.72  |
| C5-C4-C9-C21    | 38.60 | C6-C5-C8-C30    | 6.52  | C36-C35-C38-C60 | 3.51  |
| C6-C5-C8-C30    | 37.37 | C4-C5-C8-C26    | 4.58  | C36-C35-C38-C56 | 3.19  |
| C3-C4-C9-C21    | 37.33 | C36-C35-C38-C60 | 4.48  | C6-C5-C8-C30    | 3.08  |
| C1-C2-C10-C16   | 9.80  | C4-C5-C8-C30    | 4.23  | C34-C35-C38-C60 | 2.39  |
| C2-C1-C7-C11    | 9.79  | C36-C35-C38-C56 | 4.18  | C4-C5-C8-C26    | 2.19  |
| C1-C2-C10-C20   | 8.57  | C34-C35-C38-C60 | 3.04  | C34-C35-C38-C56 | 2.14  |
| C2-C1-C7-C15    | 8.56  | C34-C35-C38-C56 | 2.83  | C4-C5-C8-C30    | 1.50  |
| C3-C2-C10-C20   | 4.61  |                 |       |                 |       |
| C6-C1-C7-C15    | 4.60  |                 |       |                 |       |
| C3-C2-C10-C16   | 4.57  |                 |       |                 |       |
| C6-C1-C7-C11    | 4.55  |                 |       |                 |       |
| <b>DTPP-TO</b>  |       | <b>DTPP-NZ</b>  |       | <b>DTPP-B2Z</b> |       |
| <b>TO</b>       |       | <b>NZ</b>       |       | <b>Junction</b> |       |
| C28-C61-S65-O67 | 1.56  | C28-C61-C62-C63 | 2.88  | C57-C58-C64-C65 | 7.45  |
| C31-C64-S65-O67 | 1.30  | C62-C63-C64-C31 | 2.87  | C57-C58-C64-C63 | 7.13  |
| <b>Junction</b> |       | C28-C61-C66-C65 | 2.68  | C59-C58-C64-C65 | 7.04  |
| C27-C28-C61-C65 | 7.24  | C28-C61-C62-C73 | 2.55  | C59-C58-C64-C63 | 6.72  |
| C27-C28-C61-C62 | 6.87  | C70-C63-C64-C31 | 2.55  | C27-C28-C61-C66 | 6.70  |
| C29-C28-C61-C65 | 5.78  | C31-C64-C65-C66 | 2.43  | C29-C28-C61-C66 | 6.67  |
| C57-C58-C64-C65 | 5.55  | C69-C65-C66-C61 | 1.20  | C27-C28-C61-C62 | 6.45  |
| C29-C28-C61-C62 | 5.53  | C28-C61-C66-C67 | 1.12  | C29-C28-C61-C62 | 6.42  |
| C57-C58-C64-C63 | 5.20  | C66-C61-C62-C63 | 1.09  | <b>TPP</b>      |       |
| C59-C58-C64-C65 | 4.25  | C62-C61-C66-C65 | 1.09  | C6-C5-C8-C26    | 1.98  |
| C59-C58-C64-C63 | 4.00  | C62-C63-C64-C65 | 1.06  | C6-C5-C8-C30    | 1.92  |
| <b>TPP</b>      |       | <b>Junction</b> |       | C36-C35-C38-C60 | 1.51  |
| C36-C35-C38-C60 | 4.63  | C29-C28-C61-C62 | 22.81 | C36-C35-C38-C56 | 1.40  |
| C36-C35-C38-C56 | 3.87  | C59-C58-C64-C63 | 21.99 | C4-C5-C8-C26    | 1.36  |
| C34-C35-C38-C60 | 3.38  | C27-C28-C61-C62 | 20.42 | C4-C5-C8-C30    | 1.28  |
| C6-C5-C8-C26    | 3.32  | C29-C28-C61-C66 | 19.84 | C34-C35-C38-C60 | 1.08  |

|                 |      |                 |       |
|-----------------|------|-----------------|-------|
| C6-C5-C8-C30    | 2.96 | C57-C58-C64-C63 | 19.44 |
| C34-C35-C38-C56 | 2.73 | C59-C58-C64-C65 | 19.13 |
| C4-C5-C8-C26    | 2.18 | C27-C28-C61-C66 | 17.62 |
| C4-C5-C8-C30    | 1.79 | C57-C58-C64-C65 | 16.74 |
|                 |      | <b>TPP</b>      |       |
|                 |      | C36-C35-C38-C56 | 1.46  |
|                 |      | C34-C35-C38-C56 | 1.03  |
|                 |      | C36-C35-C38-C60 | 1.02  |

---
